# 1 **An Organoid for Woven Bone**

2 Anat Akiva<sup>1,3,4,5\*</sup>, Johanna Melke<sup>2,3</sup>, Sana Ansari<sup>2,3,5</sup>, Nalan Liv<sup>6</sup>, Robin van der Meijden<sup>5,7</sup>,  
3 Merijn van Erp,<sup>1,4</sup> Feihu Zhao<sup>2,3,8</sup>, Merula Stout<sup>5</sup>, Wouter H. Nijhuis<sup>9</sup>, Cilia de Heus<sup>6</sup>, Claudia  
4 Muñiz Ortera<sup>5</sup>, Job Fermie<sup>6</sup>, Judith Klumperman<sup>6</sup>, Keita Ito<sup>2,3</sup>, Nico Sommerdijk<sup>3,4,5,7\*</sup>, Sandra  
5 Hofmann<sup>2,3\*</sup>

6

## 7 **Affiliations:**

8 1. Department of Cell Biology, Radboud Institute of Molecular Life Sciences, Radboud  
9 University Medical Center, Geert Grooteplein 6525 GA Nijmegen, The Netherlands

10 2. Orthopaedic Biomechanics, Department of Biomedical Engineering, Eindhoven University  
11 of Technology, PO Box 513, 5600 MB, Eindhoven, the Netherlands

12 3. Institute for Complex Molecular Systems (ICMS), Eindhoven University of Technology, PO  
13 Box 513, 5600 MB, Eindhoven, the Netherlands

14 4. Electron Microscopy Center, Radboud Institute of Molecular Life Sciences, Radboud  
15 University Medical Center, Geert Grooteplein 6525 GA Nijmegen, The Netherlands

16 5. Department of Chemical Engineering and Chemistry, Laboratory of Materials and Interface  
17 Chemistry PO Box 513, 5600 MB, Eindhoven, the Netherlands

18 6. Section Cell Biology, Center for Molecular Medicine, University Medical Center Utrecht,  
19 Utrecht, The Netherlands

20 7. Department of Biochemistry, Radboud Institute of Molecular Life Sciences, Radboud  
21 University Medical Center, Geert Grooteplein 6525 GA Nijmegen, The Netherlands

22 8. Zienkiewicz Centre for Computational Engineering, College of Engineering, Swansea  
23 University, Swansea, SA1 8EN, United Kingdom.

24 9. Department of Orthopaedic Surgery, University Medical Centre Utrecht, Wilhelmina  
25 Children's Hospital, The Netherlands.

26

27 ^equal contribution

28 Corresponding authors: [anat.akiva@radboudumc.nl](mailto:anat.akiva@radboudumc.nl) ; [nico.sommerdijk@radboudumc.nl](mailto:nico.sommerdijk@radboudumc.nl);  
29 [s.hofmann@tue.nl](mailto:s.hofmann@tue.nl)

30 **Stem cell-based organoids are promising as functional, self-organizing 3D *in vitro* models for**  
31 **studying the physiology and pathology of various tissues<sup>1</sup>. Bone formation (osteogenesis) is a**  
32 **complex process in which i) cellular differentiation and ii) the generation of a mineralized organic**  
33 **matrix are synchronized to produce a hybrid hierarchical architecture. To study the molecular**  
34 **mechanisms of osteogenesis in health and disease there is great need for organoids that capture**  
35 **both processes in parallel<sup>2</sup>, however, for human bone no such functional model system is yet**  
36 **available<sup>3</sup>.**

37 **Here, we report the *in vitro* differentiation of human bone marrow stromal cells into a functional**  
38 **3D self-organizing co-culture of osteoblasts and osteocytes, creating an organoid for early stage**  
39 **bone (woven bone) formation. We demonstrate that the osteocytes form a network showing cell-**  
40 **cell communication via the expression of sclerostin, embedded within the collagen matrix that is**  
41 **formed by the osteoblasts and mineralized under biological control.**

42 Organoids have been defined as “in vitro 3D cellular clusters derived exclusively from embryonic  
43 stem cells, induced pluripotent stem cells or primary tissue, capable of self-renewal and self-  
44 organization, and exhibiting similar organ functionality as the tissue of origin”, where they may “rely

45 on artificial extracellular matrices (ECM) to facilitate their self-organization into structures that  
46 resemble native tissue architecture”<sup>1</sup>. In the case of bone, such a model system where mechanical  
47 and (bio)chemical signals can be applied in a dynamic environment, would be an important tool in  
48 the development of treatments for bone related human diseases such as osteoporosis and skeletal  
49 dysplasia such as osteogenesis imperfecta, and aid in the development of strategies for personalized  
50 bone regenerative medicine.

51 Realizing a 3D model with different interacting bone cell types is, however, still an enormous  
52 challenge. In particular the differentiation of *human* bone marrow-derived mesenchymal stromal  
53 cells (BMSCs) into osteocytes, which form 90-95% of the cellular fraction of bone tissue<sup>4</sup>, has not yet  
54 been achieved *in vitro* and currently remains a critical step in the engineering of *in vitro* human bone  
55 models.

56 *In vivo*, osteocytes form through the differentiation of osteoblasts, after these become embedded in  
57 the extracellular matrix they produce<sup>4,5</sup>. Osteocytes are responsible for sensing the biophysical  
58 demands placed on the tissue and orchestrating the concomitant actions of osteoblasts and  
59 osteoclasts in the remodeling of bone<sup>2</sup>, as well as for maintaining calcium and phosphate  
60 homeostasis. During the differentiation from osteoblasts to osteocytes, the cells grow long  
61 extensions called processes, by which they form a sensory network that translates mechanical cues  
62 into biochemical signals and through which they interact with other cells<sup>2</sup>.

63 *In vitro*, osteoblast-based cell lines developed as models of osteocytes or osteocyte differentiation  
64 have not yet been shown to produce a fully developed mineralized collagen matrix<sup>6</sup>, and hence are  
65 limited as 3D models for bone formation. So far, the full differentiation from MSCs to functional  
66 osteocytes has been demonstrated for mouse cells<sup>7,8</sup> but not yet for human cells. Recently, pre-  
67 osteocyte-like cells have been achieved from human primary cells<sup>9,10</sup>, and co-cultures were  
68 generated from pre-prepared populations of osteoblasts and osteocytes<sup>11</sup>, but the *in vitro* production  
69 of a bone-like mineralized matrix formed under biological control was not yet demonstrated. Also

70 missing is a demonstration of the production of sclerostin by osteocytes at the protein level, where  
71 sclerostin is a key anti-anabolic molecule that interacts with osteoblasts to down-regulate ECM  
72 formation. Hence, the creation of an organoid, as a model for developing bone, through the full  
73 differentiation of human primary cells into a functional osteocyte network within a bone-like  
74 mineralized matrix is still an outstanding challenge.

75 In the present work, primary human bone marrow stromal cells (hBMSC) were seeded on porous 3D  
76 silk fibroin scaffolds<sup>12</sup> and subsequently cultured in osteogenic differentiation medium. The cells  
77 were exposed to mechanical stimulation through fluid flow derived shear stress, by applying  
78 continuous stirring in a specifically designed spinner-flask bioreactor (Supplementary Fig. 1)<sup>13</sup>, while a  
79 static system was used as control. Cells subjected to mechanical loading showed the production of a  
80 mineralized extracellular matrix (ECM) - as assessed by micro-computed tomography ( $\mu$ CT) and  
81 histological staining for collagen, glycosaminoglycans and minerals (Supplementary Fig. 2). Fourier-  
82 Transformed Infrared (FTIR) spectroscopy indicated a matrix composition similar to that of  
83 embryonic chicken bones (Supplementary Fig. 3)<sup>14</sup>. In contrast, no significant ECM production was  
84 observed in the static system.

85 The differentiation from primary cells to osteoblasts and osteocytes was followed using  
86 immunohistochemistry, visualizing the expression of specific biomarkers at the protein level for the  
87 subsequent development to pre-osteoblasts, osteoblasts and osteocytes<sup>2</sup> (Fig. 1, Supplementary Fig.  
88 4). The pre-osteoblastic stage was identified by the expression of transcription factors RUNX2 (CBFA-  
89 1) and osterix (OSX, SP7) (Fig. 1 a-b, Supplementary Fig. 4). The next stage in the differentiation, the  
90 formation of osteoblasts, was heralded by the detection of osteoblast-specific markers, where  
91 alkaline phosphatase (ALP) was detected at the cell surfaces, and osteocalcin (BGLAP), osteopontin  
92 (BSP1) and osteonectin (SPARC) localized in the cellular environment (Fig. 1 c-f, Supplementary Fig.  
93 4). Finally, the differentiation into osteocytes was indicated by the expression of dentin matrix  
94 protein1 (DMP1), podoplanin (E11) and sclerostin (Fig. 1 g-i, Supplementary Fig. 4). DMP1 is a marker

95 for the early stages of osteocyte formation, coinciding with the embedding of the osteoblasts in the  
96 collagenous matrix. Podoplanin marks the osteocyte embedded in the non-mineralized matrix stage  
97 and has been suggested to regulate process formation<sup>4</sup>. Sclerostin indicates the maturation of the  
98 osteocytes and their ability to perform their signaling function in the bone regulatory process<sup>2,15</sup>. We  
99 note that the rate of osteocyte differentiation depended on the glucose concentration in the  
100 medium, as indicated by the detection of sclerostin after ~4 weeks for 5.55 mM glucose (Fig. 1 i) and  
101 ~ 8 weeks for 25 mM glucose (Fig. 1 k).

102 Fluorescence microscopy using calcein staining showed the co-localization of sclerostin and mineral  
103 in large domains with dimensions of hundreds of micrometers, indicating the embedding of the  
104 osteocytes in a mineralized organic matrix (Fig. 1 k). Indeed, combined staining with calcein (mineral)  
105 and CNA35 (collagen) revealed the presence of sub-millimeter sized mineralized collagen domains  
106 (Fig. 1 l) throughout the entire scaffold, co-existing with non-mineralized domains osteoblast markers  
107 were also still observed (Supplementary Fig. 5). This implies that this co-culture presents different  
108 stages of osteogenic cell differentiation and maturation in which osteocytes had formed that  
109 organized themselves with the mineralized matrix also produced by the system.

110 Fluorescence microscopy further confirmed osteocyte formation showing the development of cell  
111 processes, and the formation of an interconnected network (Fig. 2 a). Additionally, three dimensional  
112 focused ion beam/scanning electron microscopy (3D FIB/SEM) showed that the cells form a relatively  
113 dense 3D network with significant variation in their morphologies, as well as in the number, lengths  
114 and connectivity of their processes (Fig. 2 b-e, Supplementary table 1 and 2). We note that our  
115 osteocytes most often show flattened morphologies, which differ from those in text books with  
116 generally spherical or oblate bodies and long homogeneous protrusions but are similar to osteocyte  
117 morphologies observed in different bone types, including rat tibia,<sup>16</sup> human femur<sup>17</sup> and mouse  
118 woven bone<sup>18</sup>.

119 Cells showed both connected and unconnected processes, with connections to 1-7 neighboring cells  
120 (Fig 2 f, Supplementary Fig. 7 and table 2). The network had a density of 750,000 cells.mm<sup>-3</sup>, which is  
121 higher than observed for mature osteocytes in cortical bone (20,000-80,000 cells.mm<sup>-3</sup>)<sup>5</sup>, but in line  
122 with numbers found for woven bone such as in embryonic chicken tibia (500,000-700,000 cells.mm<sup>-3</sup>)<sup>19</sup>. Image analysis (Supplementary Fig. 11) showed that for the different cells the number of  
123 processes per unit surface area ranged between 0.05 - 0.23 μm<sup>-2</sup> (Supplementary Table 3), in line  
124 with reported for mouse osteocytes (0.08 – 0.09 μm<sup>-2</sup>)<sup>20</sup>. The functionality of the processes was  
125 indicated not only by their connection to neighboring cells (Fig. 2 g-h), but also by their co-  
126 localization with connexin43, a protein essential for gap junction communication (Fig. 2 i)<sup>2</sup>. The  
127 observed variation in osteocyte morphology, together with the variation in the number of cell  
128 processes per surface area reflects the different stages of development and maturation, as expected  
129 in a differentiating osteogenic co-culture.  
130

131 To evaluate the physiological relevance of our co-culture model system, we also analyzed its  
132 capability to reproduce the bone extracellular matrix. FIB/SEM volume imaging with 3D  
133 reconstruction showed that the osteocytes were fully embedded in their ECM (Fig. 3 a; Video 1). The  
134 produced collagen matrix enveloped the cells, but showed a low degree of long range order (Fig. 3 b),  
135 as known for woven bone<sup>18,21</sup>, and in line with what was described for collagen layers containing  
136 osteocytes.<sup>22</sup> The extracellular deposition of non-collagenous proteins (NCPs) was evidenced by  
137 immunohistochemical analysis, showing the presence of osteocalcin, osteopontin, and DMP1 and  
138 their co-localization with collagen (Fig. 3 c-d, Supplementary Fig. 8).

139 Whereas μCT (Supplementary Fig. 2), FTIR (Supplementary Fig. 3), histochemistry (Supplementary  
140 Fig. 2), and fluorescence microscopy (Fig. 1 k) all indicated the mineralization of the organic matrix,  
141 none of these methods can provide the spatial resolution to demonstrate whether the mineral  
142 crystals are indeed, as in bone, co-assembled with the collagen fibrils<sup>23</sup>, and not just the result of  
143 uncontrolled precipitation<sup>24</sup>. We therefore applied a multiscale imaging approach to verify that

144 matrix mineralization indeed occurred under biological control. Raman micro-spectroscopy of the  
145 extracellular matrix showed the spectral signature of developing bone (Fig. 3 f) and confirmed the co-  
146 localization of the mineral with the collagen (Supplementary Fig. 9). Spectral analysis further  
147 confirmed that the mineral/matrix ratio (a key parameter for bone development, determined from  
148 the  $\text{PO}_4 \nu_4$  / Amide III vibrations intensity ratio<sup>25</sup>) in the co-culture was indeed in the range found for  
149 developing bone (Fig. 3 g)<sup>26</sup>.

150 At higher resolution (voxel size  $10 \times 10 \times 20 \text{ nm}^3$ ), 3D FIB/SEM with back scatter detection revealed thin  
151 collagen fibrils (diameters 50-80 nm) with varying degrees of mineralization as also commonly  
152 observed in the early stages of bone development<sup>27</sup> (Fig. 3 i, video-2, supplementary Fig. 10).  
153 Applying a heat map presentation showed the coexistence of non-mineralized fibrils (blue) alongside  
154 a mineralized population (green-red range). Additionally, transmission electron microscopy (TEM)  
155 showed mineralized single fibrils,<sup>7</sup> indicating that the collagen matrix was indeed mineralized under  
156 biological control (Fig. 3 j)<sup>28</sup>. Nevertheless, in some areas also larger mineral precipitates were  
157 observed (Supplementary Fig. 10 c, orange) (Video-2), possibly due to local non-biologically  
158 controlled precipitation of calcium phosphate.

159 Woven bone is the first form of mammalian bone deposited during embryonic development and  
160 fracture, before being replaced by other bone types.<sup>21</sup> Hence, in situations in which rapid formation  
161 is a prime concern, and where osteoclasts and bone remodeling do not yet play a role. Our results  
162 show the formation of a bone organoid consisting of a self-organized co-culture of osteoblasts and  
163 osteocytes representing a functional model for woven bone. We demonstrate the functionality of the  
164 organoid by showing that the ECM formed by the osteoblasts is mineralized under biological control,  
165 and that the mature osteocytes self-organize into a network within the mineralized matrix where  
166 they express sclerostin and connexin43 at the protein level.

167 Interestingly, the production of sclerostin did not prohibit ECM formation throughout the organoid,  
168 suggesting that the down regulation of this process is a local effect. This may be explained by

169 assuming the most mature osteocytes are in the center of the osteocyte domains, which would lead  
170 to a gradient of sclerostin decreasing towards the periphery of the network, only affecting the  
171 activity of the osteoblasts closest to the osteocyte domain.

172 The use of silk fibroin as a scaffold material rather than the frequently used collagen scaffolds,  
173 permits to differentiate between the supplied and the newly formed matrix material, and study the  
174 quality of the collagen matrix as function of external stimuli (mechanical load, therapeutics) or  
175 genetic diseases (e.g. osteogenesis imperfecta). The application of mechanical stimulation during the  
176 development of our stem cell based co-culture proved crucial for the osteogenic differentiation, and  
177 underlines the importance of the integration of self-organizing stem cell based strategies with  
178 environmental control in microfluidic systems in the recent organoid-on-a-chip approaches.<sup>29</sup>

179

180 **Acknowledgments:** We would like to thank like Lia Addadi and Steve Weiner for providing the  
181 zebrafish and embryonic chicken data, and Carlijn Bouten for providing CNA35 collagen probe. We  
182 also thank Deniz Daviran for her help in preparing the figures. AA was supported by the Marie Curie  
183 Individual Fellowship (H2020-MSCA-IF-2017-794296-SUPERMIN), by the Netherlands Organization  
184 for Scientific Research (NWO) through an ECHO grant to NS, and by the National Postdoctoral Award  
185 Program for Advancing Women in Science - the Weizmann Institute of Science, Israel. NS, RvdM and  
186 MvE were supported by the European Research Council (ERC) Advanced Investigator grant (H2020-  
187 ERC-2017-ADV-788982-COLMIN) to NS, SA was supported by the Ministry of Education, Culture and  
188 Science (Gravitation Program 024.003.013). NL was supported by the Netherlands Organization for  
189 Scientific Research (NWO) through a ZonMW-TOP grant to JK. JM, FZ and SH were supported by the  
190 ERC Starting grant (FP7-ERC-2013-StG-336043-REMOTE) to SH.

191 **Author Contributions:** AA, KI, NS, SH designed the project and wrote the paper. AA, JM, SA were  
192 responsible for 3D cell culture, light and fluorescent imaging and analyzed the data. NL, JF, CdeH and  
193 JK prepared samples for EM and took EM images. RvdM, AA and NS acquired and analyzed the



194 spectroscopic data. MS, CMO and AA performed the FIB/SEM reconstruction and segmentation.  
195 CMO, FZ, RvdM, AA, NS, MvE and SH analyzed the connectivity map of the osteocyte network. WHN  
196 provided the bone reference sample. All authors read the paper and gave their comments.

197

198 **Competing Interests statement:**

199 The authors declare no competing interests

200

201 **Data availability statements:**

202 The datasets generated during and/or analysed during the current study are available from the  
203 corresponding author on reasonable request

204

205 **Code availability:**

206 Computer codes are available at: [https://filesender.surf.nl/?s=download&token=e5f72e20-](https://filesender.surf.nl/?s=download&token=e5f72e20-2240-4f58-abe3-3ecbeaab54f2)  
207 [2240-4f58-abe3-3ecbeaab54f2](https://filesender.surf.nl/?s=download&token=e5f72e20-2240-4f58-abe3-3ecbeaab54f2)

208

209 **Materials and methods:**

210 **Materials:**

211 Dulbecco's modified Eagle medium (DMEM high glucose Cat. No. 41966 and low glucose Cat. No.  
212 31885) and antibiotic/antimycotic (Anti-Anti) were from Life Technologies (Bleiswijk, The  
213 Netherlands). Citrate buffer was from Thermo Fisher Scientific (Breda, The Netherlands). Methanol  
214 was from Merck (Schiphol-Rijk, The Netherlands). Trypsin-EDTA (0.25%) was from Lonza (Breda, The  
215 Netherlands). Fetal bovine serum (FBS) was from PAA Laboratories (Cat. No A15-151, Cölbe,  
216 Germany). 10-nm Au particles conjugated to Protein-A were from CMC, UMC Utrecht (Utrecht, The  
217 Netherlands). BSA-c was from Aurion (Wageningen, The Netherlands). Silkworm cocoons from  
218 *Bombyx mori* L. were purchased from Tajima Shoji Co., LTD. (Yokohama, Japan). All other substances  
219 were of analytical or pharmaceutical grade and obtained from Sigma Aldrich (Zwijndrecht, The  
220 Netherlands). The reference human bone sample used for Raman micro-spectrometry was waste  
221 material from a surgical procedure on a fractured left tibia of a 10-year-old female. According to the  
222 Central Committee on Research involving Human Subjects (CCMO), this type of study does not  
223 require approval from an ethics committee in the Netherlands (see  
224 [https://english.ccmo.nl/investigators/legal-framework-for-medical-scientific-research/your-research-](https://english.ccmo.nl/investigators/legal-framework-for-medical-scientific-research/your-research-is-it-subject-to-the-wmo-or-not)  
225 [is-it-subject-to-the-wmo-or-not](https://english.ccmo.nl/investigators/legal-framework-for-medical-scientific-research/your-research-is-it-subject-to-the-wmo-or-not)). For information on the embryonic chicken bone and zebrafish bone  
226 we refer to references 14 (Kerschnitzky et al. ) and 26 (Akiva et al.), respectively.

227

228 **Scaffold fabrication:**

229 Silk fibroin scaffolds were produced as previously described<sup>30</sup>. Briefly, *Bombyx mori* L. silkworm  
230 cocoons were degummed by boiling in 0.2M Na<sub>2</sub>CO<sub>3</sub> twice for 1 h. The dried silk was dissolved in 9 M  
231 LiBr and dialyzed against ultra-pure water (UPW) for 36 h using SnakeSkin Dialysis Tubing (molecular  
232 weight cutoff: 3.5 K; Thermo Fisher Scientific, Breda, The Netherlands). Dialyzed silk fibroin solution  
233 was frozen at -80°C and lyophilized (Freezone 2.5, Labconco, Kansas City, MO, USA) for 4 days, then  
234 dissolved in hexafluoro-2-propanol, resulting in a 17% (w/v) solution. 1 ml of dissolved silk fibroin

235 was added to 2.5 g NaCl with a granule diameter of 250–300  $\mu\text{m}$  and was allowed to air dry for 3  
236 days. Silk-salt blocks were immersed in 90% MeOH for 30 min to induce  $\beta$ -sheet formation<sup>31</sup>. NaCl  
237 was extracted from dried blocks in UPW for 2 days. Scaffolds were cut into disks of 5 mm in diameter  
238 and 3 mm in height and autoclaved in PBS at 121°C for 20 min.

239

#### 240 **Cell culture:**

241 Cells were isolated from unprocessed, fresh, human bone marrow (Lonza, Walkersville, MD, USA, cat.  
242 No #1M-125) of one male donor (healthy, non-smoker). hBMSC isolation and characterization was  
243 performed as previously described and passaged up to passage 4<sup>30</sup>. Pre-wetted scaffolds were  
244 seeded with 1 million cells each in 20  $\mu\text{L}$  control medium (DMEM, 10% FBS, 1% Anti-Anti) and  
245 incubated for 90 min at 37° C. The cell-loaded scaffolds were transferred to custom-made spinner  
246 flask bioreactors (n = 4 per bioreactor, Supplementary Fig. 1). Each bioreactor contained a magnetic  
247 stir bar and was placed on a magnetic stirrer (RTv5, IKA, Germany) in an incubator (37° C, 5% CO<sub>2</sub>).  
248 Each bioreactor was filled with 5 mL osteogenic medium (control medium, 50  $\mu\text{g}/\text{mL}$  ascorbic-acid-2-  
249 phosphate, 100 nM dexamethasone, 10 mM  $\beta$ -glycerophosphate) and medium was changed 3 times  
250 a week.

251

#### 252 **Micro-computed tomography imaging ( $\mu\text{CT}$ ):**

253  $\mu\text{CT}$  measurements and analysis were performed on a  $\mu\text{CT}100$  imaging system (Scanco Medical,  
254 Brüttsellen, Switzerland). Scanning of the co-culture samples within the bioreactor was performed at  
255 an isotropic nominal resolution of 17.2  $\mu\text{m}$ , energy level was set to 45 kVp, intensity to 200  $\mu\text{A}$ , 300  
256 ms integration time and two-fold frame averaging. A constrained Gaussian filter was applied to  
257 reduce part of the noise. Filter support was set to 1.0 and filter width sigma to 0.8 voxel. Filtered  
258 grayscale images were segmented at a global threshold of 23% of the maximal grayscale value to  
259 separate the mineralized tissue from the background and binarize the image. Unconnected objects  
260 smaller than 50 voxels were removed and neglected for further analysis. Quantitative

261 morphometrical analysis was performed to assess mineralized ECM volume within the entire scaffold  
262 volume using direct microstructural bone analysis as previously described for human bone  
263 biopsies<sup>32,33</sup>.

264

265 **Histological sections:**

266 Co-cultures were fixed in 10% neutral buffered formalin (24 h at 4° C), dehydrated in serial ethanol  
267 solutions (50%, 70%, 90%, 96%, 100%, 100%, 100%), embedded in paraffin, cut into 6 µm thick  
268 sections and mounted on Poly-L-Lysine coated microscope slides. Paraffin sections were dewaxed  
269 with xylene and rehydrated to water through graded ethanol solutions.

270 *Brightfield imaging:*

271 Sections were stained with Alizarin Red to identify mineralization (2%, Sigma-Aldrich), Picrosirius Red  
272 (0.1%, Sigma-Aldrich) to identify collagen, Alcian blue (1%, Sigma-Aldrich) to identify  
273 Glycosaminoglycan (GAGs). Sections were imaged using Zeiss Axio Observer Z1 microscope.

274 *Immunohistochemistry:*

275 Antigen retrieval in pH 6 citrate buffer at 95° C was performed for 20 min. Sections were washed  
276 three times in PBS. Non-specific antibody binding was blocked with 5% serum (v/v) from the host of  
277 the secondary AB and 1% bovine serum albumin (w/v) in PBS (blocking buffer) for 1 h. Sections were  
278 then incubated overnight at 4° C with primary antibodies in blocking buffer. The sections were rinsed  
279 with PBS four times for 5 min and incubated for 1 h with secondary antibodies in blocking buffer and  
280 at times with calcein solution (1 µg/mL, C0875 Sigma-Aldrich). All used antibodies and dyes are listed  
281 in Table 1. Nuclei were stained with DAPI for 5 min, after which sections were again washed three  
282 times with PBS and mounted on microscope glass slides with Mowiol. Cytoplasm was stained with  
283 FM 4-64 (Molecular Probes cat#T3166) for 1 minute and followed by washing the sections three  
284 times with PBS. Except for primary antibody incubation, all incubation steps were performed at room  
285 temperature. Sections were imaged either by Zeiss Axiovert 200M microscope (large field of view) or

286 by Leica TCS SP5X (x63, high magnification images). Images were post processed (brightness,  
 287 contrast, channel merging and crop) using Fiji software.

288 Table 1. List of all antibodies and dyes used.

| Antigen        | Source                 | Cat. No       | Label        | Species | Dilution/concentration |
|----------------|------------------------|---------------|--------------|---------|------------------------|
| ALP            | ThermoFisher           | MA5-<br>17030 | -            | Mouse   | 1:200                  |
| Calcein Green  | Sigma                  | C0875         | -            | -       | 1 µg/ml                |
| CNA35-mCherry  | Homemade <sup>34</sup> | -             | mCherry      | -       | 1 µM                   |
| Collagen1      | Abcam                  | ab34710       | -            | Rabbit  | 1:250                  |
| Connexin 43    | Sigma                  | C6219         | -            | Rabbit  | 1:500                  |
| DAPI           | Sigma                  | D9542         | -            | -       | 0.1 µg/ml              |
| DMP1           | biorbyt                | orb247330     | -            | Rabbit  | 1:400                  |
| FM 4-64        | Molecular<br>Probes    | T3166         | -            | -       | 5 µg/ml                |
| Osteocalcin    | Abcam                  | Ab93876       | -            | Rabbit  | 1:200                  |
| Osteonectin    | ThermoFisher           | MA1-<br>43027 | -            | Mouse   | 1:500                  |
| Osteopontin    | ThermoFisher           | 14-9096-82    | -            | Mouse   | 1:200                  |
| OSX            | Abcam                  | ab22552       | -            | Rabbit  | 1:200                  |
| Podoplanin     | Abcam                  | ab128994      | -            | Rabbit  | 1:200                  |
| RUNX2          | Abcam                  | Ab23981       | -            | Rabbit  | 1:500                  |
| Sclerostin     | ThermoFisher           | PA5-37943     | -            | Goat    | 1:200                  |
| Goat IgG (H+L) | Jackson<br>Immuno      | A11055        | Alexa<br>488 | Donkey  | 1:200                  |

|                  |                     |                 |              |        |       |
|------------------|---------------------|-----------------|--------------|--------|-------|
| Mouse IgG (H+L)  | Molecular<br>Probes | A21236          | Alexa<br>647 | Goat   | 1:200 |
| Mouse IgG (H+L)  | Jackson<br>Immuno   | 715-545-<br>150 | Alexa<br>488 | Donkey | 1:200 |
| Rabbit IgG (H+L) | Invitrogen          | A21206          | Alexa<br>488 | Donkey | 1:200 |
| Rabbit IgG (H+L) | Molecular<br>Probes | A21244          | Alexa<br>647 | Goat   | 1:200 |
| Alizarin Red     | Sigma-Aldrich       | A5533           | -            | -      | 2%    |
| Picrosirius Red  | Sigma-Aldrich       | 365548          | -            | -      | 0.1%  |
| Alcian blue      | Sigma-Aldrich       | A5268           | -            | -      | 1%    |

289

290 **Sample preparation for electron microscopy:**

291 Samples were processed for electron microscopy as previously described<sup>35</sup>. In short, co-culture  
292 samples were fixed in 2.5% glutaraldehyde and 2% paraformaldehyde in 0.1 M sodium cacodylate  
293 buffer (CB) for 72 h and washed 5 times in 0.1 M CB and 5 times in double-distilled water (ddH<sub>2</sub>O).  
294 Co-cultures were then post fixed using 1% OsO<sub>4</sub> with 0.8% K<sub>3</sub>Fe(CN)<sub>6</sub> in 0.1 M CB for 1 hour on ice.  
295 After rinsing in 0.1 M CB, the co-cultures were treated with 1% Tannic acid followed by 1% uranyl  
296 acetate in ddH<sub>2</sub>O for 1 hour. Finally, the samples were rinsed using ddH<sub>2</sub>O, dehydrated with ethanol  
297 (50%, 70%, 90%, 96%, 100%), and embedded in Epon resin.

298

299 **Focused Ion Beam Scanning Electron Microscopy (FIB/SEM) imaging:**

300 Epon embedded samples were imaged with a Scios FIB/SEM (Thermo Fisher Scientific, Breda, The  
301 Netherlands) under high vacuum conditions. Using the gas injection system (GIS) in the FIB/SEM  
302 microscope, a 500 nm thick layer of Pt was deposited over the ROI, at an acceleration voltage of 30  
303 kV and a current of 1 nA. Trenches flanking the ROI were milled at an acceleration voltage of 30 kV,

304 using a high FIB beam current (5-7 nA), followed by a staircase pattern in front of the ROI to expose  
305 the imaging surface. Fine polishing was performed with the ion beam set to 30 kV with a FIB beam  
306 current of 0.5 nA, resulting in a smooth imaging surface. Serial imaging was then performed using the  
307 in-column backscattered electron detector, and the following settings: Acceleration voltage 2 kV,  
308 Beam current 0.2 nA, Pixel dwell time 10  $\mu$ s, voxel size: 30x30x30 nm (stack in video 1) and 10x10x20  
309 nm (stack in Video 2).

310

### 311 **Sample preparation for Transmission Electron Microscopy (TEM):**

312 Epon embedded samples: 70 nm sections from resin embedded blocks were made using an ultra-  
313 microtome (Leica), and collected on carbon coated copper TEM grids. Post staining with uranyl  
314 acetate and lead citrate was performed using the Leica EM AC20 automatic contrasting instrument.

315

### 316 **Preparation and Immunogold labelling of Tokuyasu Sections:**

317 Thin sections were prepared following the Tokuyasu protocol<sup>36,37</sup>. Briefly, co-cultures were fixed as  
318 described above and infiltrated overnight in 2.3 M sucrose for cryo-protection. Small blocks of the  
319 co-cultures were mounted on aluminum pins and plunge frozen in liquid nitrogen. 70 nm thick  
320 cryosections were sectioned with a cryo-ultramicrotome and picked up with a mixture of 2%  
321 methylcellulose/2.3 M sucrose on copper support grids coated with formvar and carbon. After rinsing  
322 away the pick-up solution in PBS at 37° C for 30 minutes, the sections were treated with PBS  
323 containing 0.15% glycine, followed by blocking for 10 minutes with 0.5% cold fish skin gelatin and  
324 0.1% BSA-c in PBS. The TEM grids were incubated for 1 hour with a collagen type 1 antibody in  
325 blocking solution (Abcam, AB34710). The grids were then rinsed with 0.1% BSA in PBS and incubated  
326 with 10-nm Au particles conjugated to Protein-A in blocking solution.<sup>38</sup> The sections were then  
327 thoroughly washed in ddH<sub>2</sub>O, stained with uranyl acetate and embedded in methylcellulose.<sup>38</sup>

328

329

330 **TEM imaging:**

331 The sections were imaged using a Tecnai T12 TEM (80kV) (Thermo Fisher Scientific, Breda, The  
332 Netherlands), equipped with Veleta (EMSIS GmbH, Münster, Germany).

333

334 **Raman spectroscopy:**

335 Raman measurements were conducted using a WiTec Alpha 300R confocal Raman microscope. Co-  
336 culture samples were fixed in 10% neutral buffered formalin (24 h at 4° C), incubated for 2 hours in  
337 5% sucrose at 4° C, embedded in Tissue-Tek (Sakura Finetek 4609024), cut into 10 µm thick sections  
338 and mounted on Poly-L-Lysine coated microscope slides. Raman imaging was conducted using 532  
339 nm excitation lasers with a laser power of 10 mW, using 50x 0.8 objective (0.8 NA) with a grating of  
340 600 gr/mm. The maps were obtained with a spatial resolution of 3 spectra/µm. Data analysis was  
341 performed using Project V plus software (Witec , Ulm) and Origin 8.

342

343 **FTIR spectroscopy:**

344 Prior to the FTIR measurement, the co-culture samples were freeze dried overnight. After drying, 1.5  
345 mg of the samples was crushed using mortar and pestle until a fine powder was achieved. After this,  
346 148.5 mg of KBr was added to the mortar and pestle and the materials were mixed and further  
347 crushed to a fine homogeneous mixture. The mixture was added to a pellet press holder, the  
348 transparent and homogeneous pellets were then inserted into the FTIR spectrometer (Perking Elmer  
349 one 1600). The FTIR spectra were obtained in transmission mode. Spectra were obtained over the  
350 range from 200 cm<sup>-1</sup> to 6000 cm<sup>-1</sup> with a spectral resolution of 0.5 cm<sup>-1</sup>.

351 **Image Analysis:**

352 3D FIB/SEM Image processing was performed using Matlab and Avizo 3D software (FEI VSG,  
353 [www.avizo3d.com](http://www.avizo3d.com)). 3D image reconstruction, alignment, denoising and brightness and contrast  
354 adjustments were done usign Matlab. 3D segmentation was done using Avizo. Segmentation was



355 performed using manual thresholding, and cell processes were counted manually. As all cells were  
356 only partially captured in the available FIB/SEM volume, cell process density was determined per unit  
357 surface area of the cell body. The surface areas of cell parts captured in the FIB/SEM volume were  
358 calculated from the segmented 3D image mask using Matlab and Fiji. Further details are given in  
359 Supplementary Fig. 11.

360 Cell density was determined from the number of cells in the imaged FIB/SEM volume ( $20\ \mu\text{m} \times 20\ \mu\text{m}$   
361  $\times 40\ \mu\text{m}$ ) and compared to literature data from histological sections<sup>19</sup> (volume  $5\ \mu\text{m} \times 1000\ \mu\text{m} \times$   
362  $1000\ \mu\text{m}$ ).

363

364 **References**

- 365 1 Fatehullah, A., Tan, S. H. & Barker, N. Organoids as an in vitro model of human development  
366 and disease. *Nat Cell Biol* **18**, 246-254, doi:10.1038/ncb3312 (2016).
- 367 2 in *Principles of Bone Biology (Fourth Edition)* (eds John P. Bilezikian, T. John Martin, Thomas  
368 L. Clemens, & Clifford J. Rosen) 1943-1986 (Academic Press, 2020).
- 369 3 Owen, R. & Reilly, G. C. In vitro Models of Bone Remodelling and Associated Disorders. *Front*  
370 *Bioeng Biotechnol* **6**, 134, doi:10.3389/fbioe.2018.00134 (2018).
- 371 4 Bonewald, L. F. The amazing osteocyte. *J Bone Miner Res* **26**, 229-238, doi:10.1002/jbmr.320  
372 (2011).
- 373 5 Franz-Odenaal, T. A., Hall, B. K. & Witten, P. E. Buried alive: How osteoblasts become  
374 osteocytes. *Dev Dynam* **235**, 176-190 (2006).
- 375 6 Zhang, C., Bakker, A. D., Klein-Nulend, J. & Bravenboer, N. Studies on Osteocytes in Their 3D  
376 Native Matrix Versus 2D In Vitro Models. *Curr Osteoporos Rep* **17**, 207-216,  
377 doi:10.1007/s11914-019-00521-1 (2019).
- 378 7 Wang, K. *et al.* A Novel Osteogenic Cell Line That Differentiates Into GFP-Tagged Osteocytes  
379 and Forms Mineral With a Bone-Like Lacunocanalicular Structure. *J Bone Miner Res* **34**, 979-  
380 995, doi:10.1002/jbmr.3720 (2019).
- 381 8 Iordachescu, A. *et al.* An In Vitro Model for the Development of Mature Bone Containing an  
382 Osteocyte Network. *Advanced Biosystems* **2**, doi:10.1002/adbi.201700156 (2018).
- 383 9 Thrivikraman, G. *et al.* Rapid fabrication of vascularized and innervated cell-laden bone models  
384 with biomimetic intrafibrillar collagen mineralization. *Nat Commun* **10**, 3520,  
385 doi:10.1038/s41467-019-11455-8 (2019).
- 386 10 Nasello, G. *et al.* Primary Human Osteoblasts Cultured in a 3D Microenvironment Create a  
387 Unique Representative Model of Their Differentiation Into Osteocytes. *Frontiers in*  
388 *Bioengineering and Biotechnology* **8**, doi:10.3389/fbioe.2020.00336 (2020).
- 389 11 Skottke, J., Gelinsky, M. & Bernhardt, A. In Vitro Co-culture Model of Primary Human  
390 Osteoblasts and Osteocytes in Collagen Gels. *Int J Mol Sci* **20**, doi:10.3390/ijms20081998  
391 (2019).
- 392 12 Vetsch, J. R., Paulsen, S. J., Muller, R. & Hofmann, S. Effect of fetal bovine serum on  
393 mineralization in silk fibroin scaffolds. *Acta Biomater* **13**, 277-285,  
394 doi:10.1016/j.actbio.2014.11.025 (2015).
- 395 13 Melke, J., Zhao, F., van Rietbergen, B., Ito, K. & Hofmann, S. Localisation of mineralised tissue  
396 in a complex spinner flask environment correlates with predicted wall shear stress level  
397 localisation. *Eur Cell Mater* **36**, 57-68, doi:10.22203/eCM.v036a05 (2018).
- 398 14 Kerschnitzki, M. *et al.* Bone mineralization pathways during the rapid growth of embryonic  
399 chicken long bones. *J Struct Biol* **195**, 82-92, doi:10.1016/j.jsb.2016.04.011 (2016).
- 400 15 Kenneth E. S. Poole, R. L. v. B., Nigel Loveridge, Herman Hamersma, & Socrates E. Papapoulos,  
401 C. W. L., and Jonathan Reeve. Sclerostin is a delayed secreted product of osteocytes that  
402 inhibits bone formation. *The FASEB Journal* **19**, 1842-1844 (2005).
- 403 16 Verbruggen, S. W., Vaughan, T. J. & McNamara, L. M. Strain amplification in bone  
404 mechanobiology: a computational investigation of the in vivo mechanics of osteocytes. *J R Soc*  
405 *Interface* **9**, 2735-2744, doi:10.1098/rsif.2012.0286 (2012).
- 406 17 Varga, P. *et al.* Synchrotron X-ray phase nano-tomography-based analysis of the lacunar-  
407 canalicular network morphology and its relation to the strains experienced by osteocytes in  
408 situ as predicted by case-specific finite element analysis. *Biomech Model Mechanobiol* **14**, 267-  
409 282, doi:10.1007/s10237-014-0601-9 (2015).
- 410 18 Kerschnitzki, M. *et al.* The organization of the osteocyte network mirrors the extracellular  
411 matrix orientation in bone. *J Struct Biol* **173**, 303-311, doi:10.1016/j.jsb.2010.11.014 (2011).
- 412 19 Yair, R., Cahaner, A., Uni, Z. & Shahar, R. Maternal and genetic effects on broiler bone  
413 properties during incubation period. *Poult Sci* **96**, 2301-2311, doi:10.3382/ps/pex021 (2017).
- 414 20 Tokarz, D. *et al.* Intravital imaging of osteocytes in mouse calvaria using third harmonic  
415 generation microscopy. *PLoS One* **12**, e0186846, doi:10.1371/journal.pone.0186846 (2017).

- 416 21 and, S. W. & Wagner, H. D. THE MATERIAL BONE: Structure-Mechanical Function Relations.  
417 *Annual Review of Materials Science* **28**, 271-298, doi:10.1146/annurev.matsci.28.1.271 (1998).
- 418 22 Reznikov, N., Shahar, R. & Weiner, S. Three-dimensional structure of human lamellar bone:  
419 The presence of two different materials and new insights into the hierarchical organization.  
420 *Bone* **59**, 93-104, doi:<https://doi.org/10.1016/j.bone.2013.10.023> (2014).
- 421 23 Reznikov, N., Shahar, R. & Weiner, S. Bone hierarchical structure in three dimensions. *Acta*  
422 *Biomaterialia* **10**, 3815-3826 (2014).
- 423 24 de Wildt, B. W. M. *et al.* From bone regeneration to three-dimensional in vitro models: tissue  
424 engineering of organized bone extracellular matrix. *Current Opinion in Biomedical Engineering*  
425 **10**, 107-115, doi:<https://doi.org/10.1016/j.cobme.2019.05.005> (2019).
- 426 25 Kazanci, M., Roschger, P., Paschalis, E. P., Klaushofer, K. & Fratzl, P. Bone osteonal tissues by  
427 Raman spectral mapping: Orientation–composition. *Journal of Structural Biology* **156**, 489-  
428 496, doi:<https://doi.org/10.1016/j.jsb.2006.06.011> (2006).
- 429 26 Akiva, A. *et al.* Mineral Formation in the Larval Zebrafish Tail Bone Occurs via an Acidic  
430 Disordered Calcium Phosphate Phase. *J Am Chem Soc* **138**, 14481-14487,  
431 doi:10.1021/jacs.6b09442 (2016).
- 432 27 McKee, M. D. & Nanci, A. Postembedding colloidal-gold immunocytochemistry of  
433 noncollagenous extracellular matrix proteins in mineralized tissues. *Microscopy Research and*  
434 *Technique* **31**, 44-62, doi:10.1002/jemt.1070310105 (1995).
- 435 28 Weiner, S. & Traub, W. Organization of hydroxyapatite crystals within collagen fibrils. *FEBS*  
436 *letters* **206**, 262-266 (1986).
- 437 29 Park, S. E., Georgescu, A. & Huh, D. Organoids-on-a-chip. *Science* **364**, 960-965,  
438 doi:10.1126/science.aaw7894 (2019).
- 439 30 Hofmann, S. *et al.* Control of in vitro tissue-engineered bone-like structures using human  
440 mesenchymal stem cells and porous silk scaffolds. *Biomaterials* **28**, 1152-1162,  
441 doi:10.1016/j.biomaterials.2006.10.019 (2007).
- 442 31 Nazarov, R., Jin, H.-J. & Kaplan, D. L. Porous 3-D Scaffolds from Regenerated Silk Fibroin.  
443 *Biomacromolecules* **5**, 718-726, doi:10.1021/bm034327e (2004).
- 444 32 Hildebrand T, L. A., Muller R, Dequeker J, Ruegsegger P. Direct three-dimensional  
445 morphometric analysis of human cancellous bone: microstructural data from spine, femur,  
446 iliac crest, and calcaneus. *J. Bone Miner. Res.* **14** (1999).
- 447 33 van Lenthe, G. H. *et al.* Nondestructive micro-computed tomography for biological imaging  
448 and quantification of scaffold-bone interaction in vivo. *Biomaterials* **28**, 2479-2490,  
449 doi:10.1016/j.biomaterials.2007.01.017 (2007).
- 450 34 Krahn, K. N., Bouten, C. V. C., van Tuijl, S., van Zandvoort, M. A. M. J. & Merckx, M. Fluorescently  
451 labeled collagen binding proteins allow specific visualization of collagen in tissues and live cell  
452 culture. *Analytical Biochemistry* **350**, 177-185, doi:<https://doi.org/10.1016/j.ab.2006.01.013>  
453 (2006).
- 454 35 Fermie, J. *et al.* Single organelle dynamics linked to 3D structure by correlative live-cell imaging  
455 and 3D electron microscopy. *Traffic* **19**, 354-369, doi:10.1111/tra.12557 (2018).
- 456 36 Oorschot VMJ, S. T., Bryson-Richardson RJ, Ramm G. . in *Correl. Light Electron Microsc. II* 241-  
457 258 (Academic Press, 2014).
- 458 37 van Meel, E. *et al.* Disruption of the Man-6-P targeting pathway in mice impairs osteoclast  
459 secretory lysosome biogenesis. *Traffic* **12**, 912-924, doi:10.1111/j.1600-0854.2011.01203.x  
460 (2011).
- 461 38 Slot, J., Geuze, H. Cryosectioning and immunolabeling. *Nat protoc* **2**, 2480-2491,  
462 doi:<https://doi.org/10.1038/nprot.2007.365> (2007).
- 463 39 Nyman, J. S. *et al.* Measuring Differences in Compositional Properties of Bone Tissue by  
464 Confocal Raman Spectroscopy. *Calcified Tissue International* **89**, 111-122, doi:10.1007/s00223-  
465 011-9497-x (2011).

466

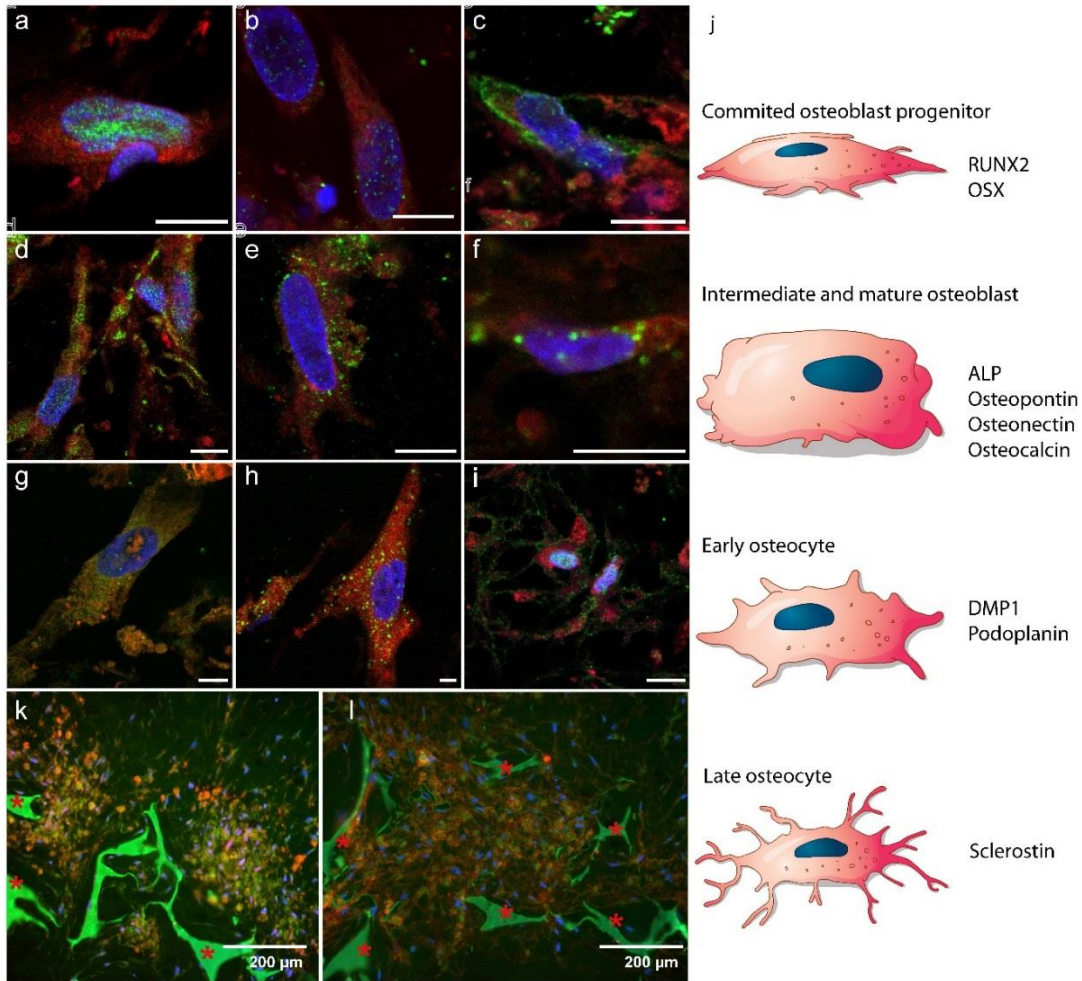

467

468 **Figure 1: Differentiation of hBMSCs into osteoblasts and osteocytes:** a-i) Fluorescence

469 immunohistochemistry imaging showing markers for a-c) early stages of osteoblast formation, d-f)

470 mature osteoblasts, and g-i) osteocyte development (5.6 mM glucose). Color code: red - cell

471 cytoplasm, blue - cell nuclei, green: a) RUNX2 (day 7) , b) OSX (day 7), c) ALP (day 26), d) osteocalcin

472 (day 26), e) osteopontin (day 26), f) osteonectin (day 21), g) DMP1 (day 28), h) podoplanin (day 28), i)

473 sclerostin (day 28). Scale bars: 10 μm. See Supplementary Fig.4 for separate channels. j) Schematic

474 illustration of MSC differentiation into osteoblasts and osteocytes, indicating at which state which

475 protein expression is expected in a-i. k,l) Fluorescent images indicating self-organized domains of

476 osteocytes embedded in a mineralized matrix after 8 weeks (25 mM glucose), k) co-localization of

477 osteocytes (sclerostin, red) and mineral (calcein, green) and l) collagen (CNA35, red) and mineral

478 (calcein, green) \* Indicates the silk fibroin scaffold.

479

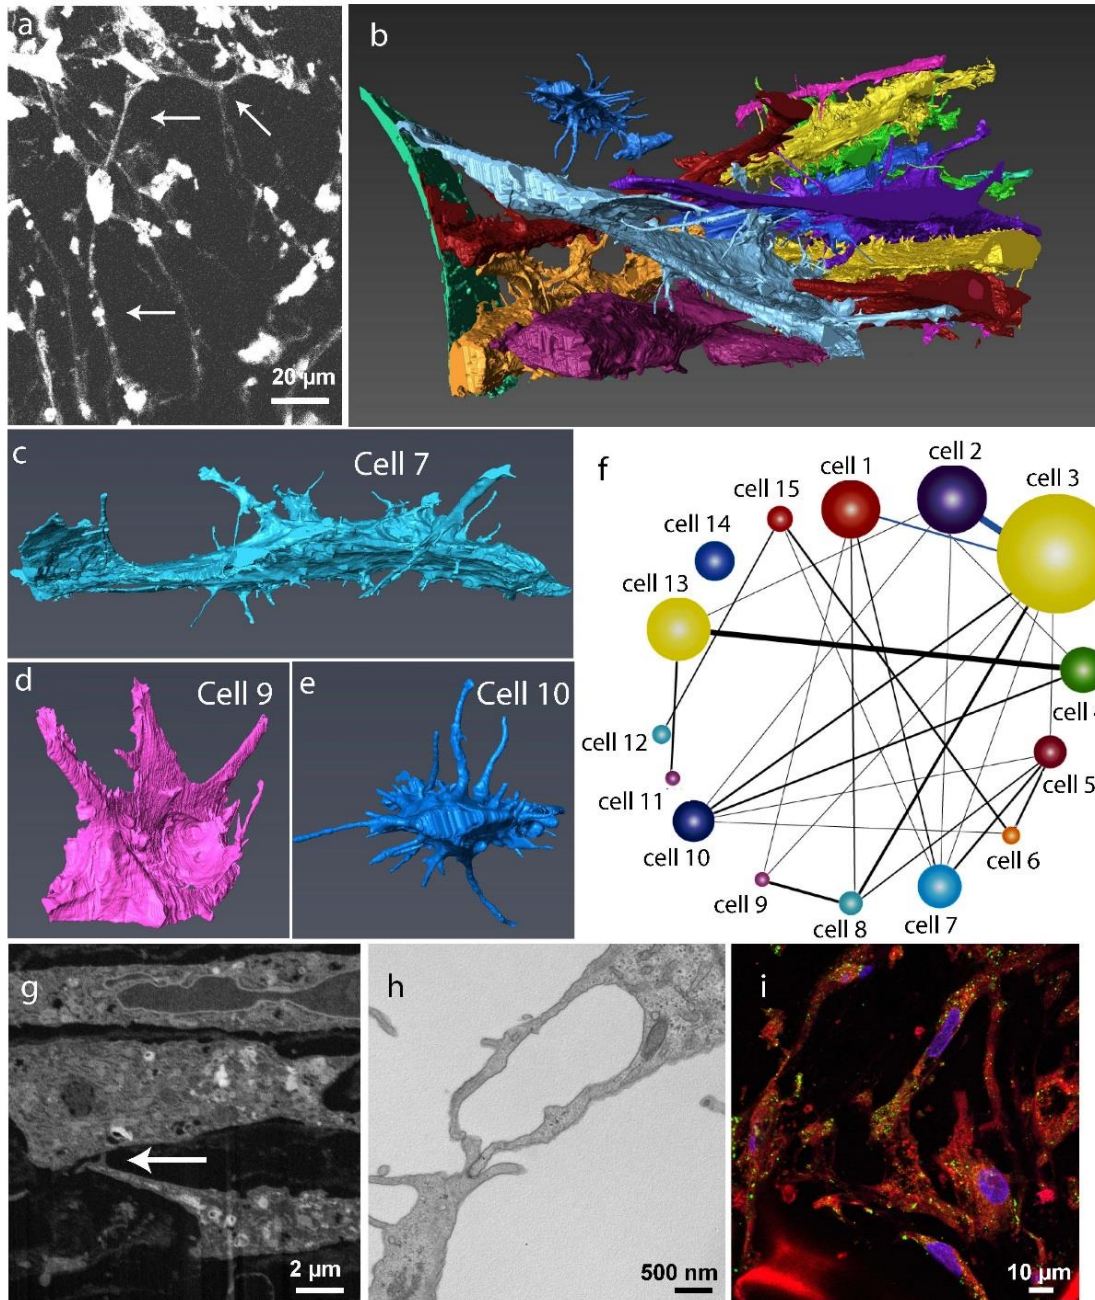

480

481 **Figure 2: Osteocyte development and network formation.** a) Fluorescent cytoplasm staining  
482 showing the development of long ( $> 5\mu\text{m}$ , arrows) cell processes connecting cells, and the formation  
483 of an interconnected network. The long processes were enhanced using a gamma value of -1.5. (see  
484 original image in supplementary fig. 6). b) 3D FIB/SEM reconstruction showing cell morphology and  
485 network formation in the whole volume. c-e) Details from the 3D reconstruction in (b) showing  
486 individual osteocytes in different stages of morphological development (cell numbers refer to

487 identification in supplementary Fig. 7). c) Cell #7, d) cell #9, e) cell #14. f-i) Cell connectivity: f)  
488 Connectivity map of the cells in the 3D FIB/SEM stack (see also Supplementary Tables 1 and 2). Sizes  
489 of the circles reflect the number of processes of that respective cell. Thickness of the lines reflects  
490 the number of connections between individual cells (cell numbers refer to identification in  
491 supplementary Fig. 7). g) single slice from the 3D FIB/SEM stack showing long processes (arrow),  
492 creating a cellular network. h) TEM image shows a gap junction between processes of two  
493 connecting cells. i) fluorescent immunohistochemistry showing the presence of gap junctions on the  
494 surface of the different cells. Color code: red - cell cytoplasm, blue - cell nuclei, green - connexin43.

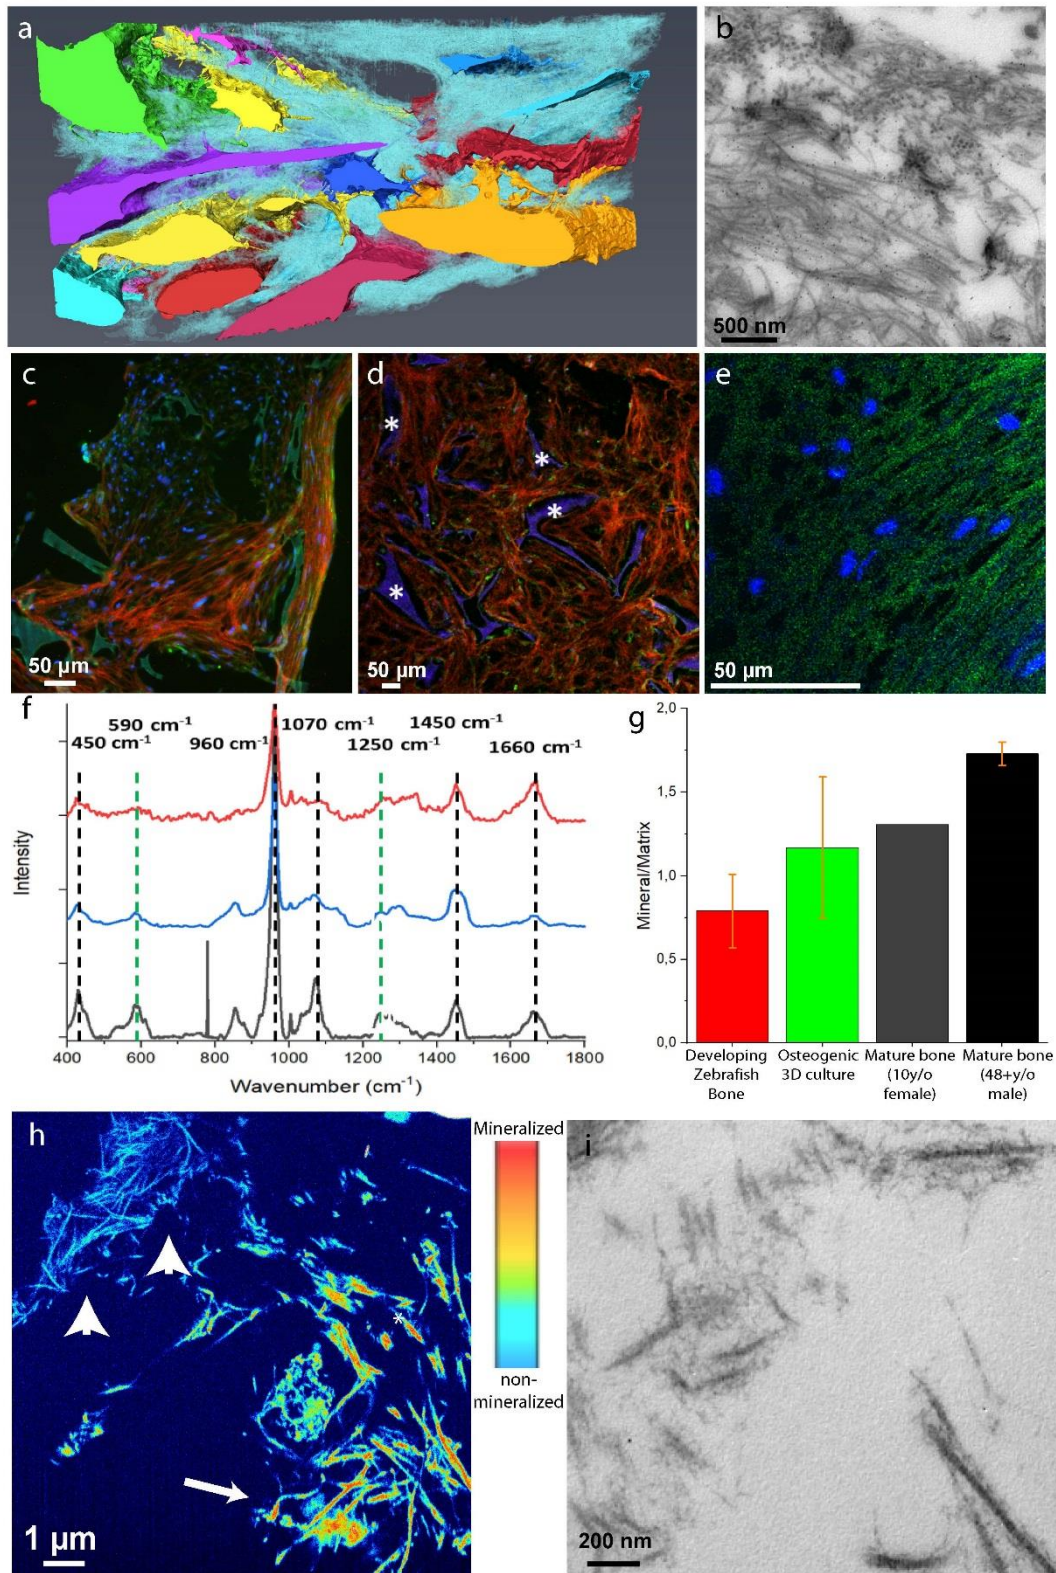

495

496

497

498 **Figure 3: Extracellular matrix development:** a) 3D FIB/SEM reconstruction shows the embedding of  
499 the cells in the collagen matrix (cyan). Discrete cells are represented with different colors. b) TEM  
500 image of a 70 nm section showing the random distribution of collagen fibrils. Collagen type I was  
501 identified by immunolabelling. c-e) Fluorescent immunohistochemistry identifying key non-  
502 collagenous proteins in the collagenous matrix: c) Co-localization of osteocalcin (green) and collagen  
503 (red). d) Osteopontin (green) distribution in the collagen matrix (red). \* Indicates the silk fibroin  
504 scaffold. e) Co-localization of DMP1 (green) with the collagen structure (see supplementary Fig. 5 for  
505 collagen image). f-g) Raman microspectrometry of mineralized matrices. f) Localized Raman spectra  
506 of mineralized collagen of developing zebrafish bone (red), the 3D osteogenic co-culture (blue) and  
507 human bone of a 10 year old female (grey g) Raman derived mineral/matrix ratios of 4 mineralized  
508 tissues of zebrafish (N=6, red), Osteogenic 3D culture (N=7, green), 10 year old human female (N=1,  
509 grey), and 48+ years old human male (N=7, black, taken from reference<sup>39</sup>). Bars indicate sample  
510 standard deviations. h) Heat map presentation of a 3D FIB/SEM cross section showing collagen fibrils  
511 with different degrees of mineralization (see Supplementary Fig. 10). Arrowheads indicate non-  
512 mineralized collagen fibrils (light blue), arrow indicates mineralized collagen fibril (orange) i) TEM  
513 image showing individual mineralized collagen fibrils.
